# Supplementary material for: NSCLC Cells Resistance to PI3K/mTOR Inhibitors Is Mediated by Delta-6 Fatty Acid Desaturase (FADS2)
Source: MDPI journal article supplement (doi:10.3390/cells11233719), 2022-11-22
Supplement: s1 [file s1]

**Supplemental Table S3.** Statistical significance of the dose-response curves reported in **Figure 1A**. Analysis was performed with two-way ANOVA and Bonferroni post-test for multiple comparisons. \*p-value<0.05, \*\*p-value<0.01, \*\*\*p-value<0.001, \*\*\*\*p-value<0.0001.

|                           | <b>BEZ-235 (nM)</b> |          |          |           |           |           |            |            |            |
|---------------------------|---------------------|----------|----------|-----------|-----------|-----------|------------|------------|------------|
|                           | <b>2</b>            | <b>4</b> | <b>8</b> | <b>16</b> | <b>32</b> | <b>64</b> | <b>128</b> | <b>256</b> | <b>512</b> |
| <b>wt vs wt_bez</b>       | ns                  | ns       | ns       | ns        | ns        | ***       | ***        | **         | **         |
| <b>wt vs G12C</b>         | ns                  | ns       | ns       | ns        | ns        | ns        | ns         | ns         | ns         |
| <b>wt_bez vs G12C_bez</b> | ns                  | ns       | ns       | ns        | ns        | ns        | ns         | ns         | ns         |
| <b>G12C vs G12C_bez</b>   | ns                  | *        | ns       | ns        | *         | ***       | ****       | ****       | ***        |

**Supplemental Table S4.** Statistical significance of the dose-response curves reported in **Supplementary Figure S1B**. Analysis was performed with two-way ANOVA and Bonferroni post-test for multiple comparisons. \*p-value<0.05, \*\*p-value<0.01, \*\*\*p-value<0.001, \*\*\*\*p-value<0.0001.

|                           | <b>BEZ-235 (nM)</b> |           |           |           |            |            |
|---------------------------|---------------------|-----------|-----------|-----------|------------|------------|
|                           | <b>5</b>            | <b>10</b> | <b>25</b> | <b>50</b> | <b>100</b> | <b>200</b> |
| <b>wt vs wt_bez</b>       | **                  | ***       | **        | ns        | **         | *          |
| <b>wt vs G12C</b>         | ns                  | *         | ns        | ns        | ns         | ns         |
| <b>wt_bez vs G12C_bez</b> | ns                  | ns        | ns        | ns        | ns         | ns         |
| <b>G12C vs G12C_bez</b>   | ns                  | *         | **        | *         | ns         | ns         |

**Supplemental Table S5.** Statistical significance of the dose-response curves reported in **Supplementary Figure S1C**. Analysis was performed with two-way ANOVA and Bonferroni post-test for multiple comparisons. \*p-value<0.05, \*\*p-value<0.01, \*\*\*p-value<0.001, \*\*\*\*p-value<0.0001.

|                           | <b>BEZ-235 (nM)</b> |           |           |           |            |            |
|---------------------------|---------------------|-----------|-----------|-----------|------------|------------|
|                           | <b>5</b>            | <b>10</b> | <b>25</b> | <b>50</b> | <b>100</b> | <b>200</b> |
| <b>wt vs wt_bez</b>       | ns                  | **        | **        | **        | **         | **         |
| <b>wt vs G12C</b>         | ns                  | ns        | ns        | ns        | ns         | ns         |
| <b>wt_bez vs G12C_bez</b> | ns                  | ns        | ns        | ns        | ns         | ns         |
| <b>G12C vs G12C_bez</b>   | ns                  | *         | ****      | ***       | ***        | **         |
