# Supplementary material for: NSCLC Cells Resistance to PI3K/mTOR Inhibitors Is Mediated by Delta-6 Fatty Acid Desaturase (FADS2)
Source: Cells. 2022 Nov 22;11(23):3719. doi: 10.3390/cells11233719 (PMC9736998; doi:10.3390/cells11233719)
Supplement: Supplementary file 1 [file cells-11-03719-s001.zip]

Archive with 4 entries (4 files):
- Supplemental table S1.xlsx
- Supplemental table S2.xlsx
- Supplemental tables S3-S5.pdf
- Supplementary figure S1.pdf
