# Supplementary material for: NSCLC Cells Resistance to PI3K/mTOR Inhibitors Is Mediated by Delta-6 Fatty Acid Desaturase (FADS2)
Source: Cells. 2022 Nov 22;11(23):3719. doi: 10.3390/cells11233719 (PMC9736998; doi:10.3390/cells11233719)
Supplement: Supplementary file 1 [file cells-11-03719-s001.zip › Supplemental table S1.xlsx]

## Sheet: wt BEZ235 vs wt untargeted
Metabolite	Fold change	intensity						m/z	adduct
	wt Bez235 vs wt	wt Bez235 R1	wt Bez235 R2	wt Bez235 R3	wt R1	wt R2	wt R3
Uridine 5'-diphosphate	only wt				449.6	191.4	155.1	384.984	M-H2O
Oxidized glutathione	5.72404	3392.74	2507.44	6041.88	1042.1	0	1044.2	611.145	M-H
Oleic acid	only wt				18262.4	1069.8	993.7	281.249	M-H
N-Acetyl-L-glutamate 5-semialdehyde	only wt				232.3	335.8	204.8	172.062	M-H
N-Acetyl-L-aspartic acid	-1.77859	26144	48483.2	30244.8	87320.5	50532.3	48671.1	174.041	M-H
Malic acid	-2.38213	12273.8	23726	14949	48749	41567.4	31050.3	133.014	M-H
L-Lactic acid	-2.38941	25607.7	49733.8	52510.4	122014	99296.8	84180.2	89.0248	M-H
D-Glucose	-2.52257		965.12	3599.96	7933.9	4909.6	4430.1	179.056	M-H
1-Pyrroline-2-carboxylic acid	3.33687	436.54	810.68	1339.52	212		304.8	112.041	M-H
SM(d18:0/12:0)	only wt Bez	23501.4	11809.2	13208.3				649.527	M-H
PE(18:4(6Z,9Z,12Z,15Z)/P-18:1(9Z))	only wt Bez	5359.38	1724.06	2006.42				720.495	M-H
PE(18:4(6Z,9Z,12Z,15Z)/P-16:0)	4.0514	7088.38	8351.72	9077.38	964.2	2404.7	2682.7	694.48	M-H
PE(18:4(6Z,9Z,12Z,15Z)/22:6(4Z,7Z,10Z,13Z,16Z,19Z))	only wt Bez	4437.16	1718.86	2766.4				782.473	M-H
PE(18:4(6Z,9Z,12Z,15Z)/20:5(5Z,8Z,11Z,14Z,17Z))	only wt Bez	3882.06	2046.72	2605.2				756.46	M-H
PE(18:3(6Z,9Z,12Z)/P-18:1(9Z))	only wt Bez	3803.8	2896.66	3556.54				722.518	M-H
PE(18:3(6Z,9Z,12Z)/20:5(5Z,8Z,11Z,14Z,17Z))	only wt Bez	1574.56	1524.64	1092.26				758.473	M-H
PE(14:0/P-18:0)	26.1654	40061.8	28515.5	32384.6		695.3	1877.1	674.512	M-H
PC(14:0/16:1(9Z))	only wt Bez	1515.54	1044.16	2257.84				702.508	M-H
Galactosylceramide (d18:1/14:0)	only wt Bez	2276.3	1503.06	2474.16				670.53	M-H
DG(14:0/22:1(13Z)/0:0)	only wt Bez	18842.7	9401.6	14158.3				621.545	M-H
CerP(d18:1/20:0)	only wt Bez	828.88	1649.18	1235.52				672.533	M-H
Ceramide (d18:1/20:0)	only wt Bez	11967	6587.36	8280.74				592.566	M-H
Arachidonic acid	only wt				6688.4	590.9	220	303.233	M-H
Tyrosine	only wt Bez	6155.5	2504.32	3523.52				204.063	M+Na
Threonine	only wt Bez	4319.64	631.02	2624.18				142.047	M+Na
Serine	only wt Bez	795.08	4184.96	2012.66				128.031	M+Na
Pyroglutamic acid	22.3109	54834	61033.4	94760.6	1210.7	4655	3574.9	130.05	M+H
Orotidylic acid	only wt				1966.7	2462.1	753	391.014	M+Na
Leucine	22.9965	5421	2741.44	11303		222.1	342.2	154.084	M+Na
Histidine	6.83564	7429.5	18269.4	29023.8		1567.5	3769.5	156.076	M+H
hexose	only wt				1859.3	6301.8	6252.2	221.042	M+K
Glutathione	2.33296	11525.3	23112.2	23079.7	4663.9	9561.8	10514.2	346.047	M+K
Glutamine	6.2316	332127	307719	430555	13756.7	75670.1	82343.1	169.058	M+Na
Glutamic acid	19.0844	254521	316887	431686	2160.9	20339.3	30060.8	148.06	M+H
Creatine	only wt				3347.6	8306	5982.6	132.076	M+H
Beta-Citryl-L-glutamic acid	7.00389	2177.76	2669.68	1131.78	246.1	215.1	392.5	344.059	M+Na
Aspartic acid	only wt Bez	909.48	709.28	1899.56				156.026	M+Na
Asparagine	8.28097	78371	75832.6	102839	2101.7	10116.4	18822	155.042	M+Na
Arginine	only wt				538.9	4310.2	1418.2	213.075	M+K
8-Hydroxyguanosine	6.23353	34431.8	36545.3	38232.5	1925.5	6090.1	9504.1	338.05	M+Na
4-Hydroxyproline	6.58521	25450.4	16579.4	25542.4		4687.9	2152.9	154.047	M+Na
PS(14:1(9Z)/20:4(5Z,8Z,11Z,14Z))	only wt Bez	14582.4	8784.88	4242.16				776.452	M+H
Phosphoserine	5.16161	11930.6	10575	10916.9	2130	3114.8	1230.4	207.998	M+Na
PE(P-16:0/18:3(6Z,9Z,12Z))	only wt Bez	40466.1	23506.3	36130.9				720.49	M+H
PE(15:0/16:0)	only wt Bez	12296.4	8744.58	6745.96				678.505	M+H
PC(22:4(7Z,10Z,13Z,16Z)/P-18:1(11Z))	2.16419	1029.6	1241.76	1593.02		802.1	388.3	858.581	M+H
PC(14:0/20:5(5Z,8Z,11Z,14Z,17Z))	only wt Bez	32643	18647.7	21527.2				790.474	M+K
PC(14:0/15:0)	only wt Bez	2807.22	1160.64	2495.74				730.476	M+K
MG(0:0/18:0/0:0)	only wt Bez	10586.2	22274.7	3804.06				397.271	M+K
lysoPC(28:0)	24.1042	203895	113896	192367	589.5	7393.4	13181.8	664.528	M+H
LysoPC(18:4(6Z,9Z,12Z,15Z))	only wt				3432.5	1922.9	1500.6	516.305	M+H
Glycerophosphocholine	3.45583	578697	530231	635065	43580.6	224456	236615	280.092	M+Na
Cer(d18:1/24:1(15Z))	only wt Bez	12104.3	3984.24	2620.8				686.583	M+H
Cer(d18:0/22:0)	8.96709	25937.1	16329.8	14330.7		960	3247.8	624.629	M+H
HMDB00201
HMDB02013
HMDB13128

## Sheet: wt BEZ235 vs wt targeted
Metabolite	Fold change	microM
	wt Bez235 vs wt	wt Bez235 R1	wt Bez235 R2	wt Bez235 R3	wt R1	wt R2	wt R3
Alanine	2.76069	222.82	207.22	213.2	72	85.3	75.7
Arginine	2.21182	118.82	165.62	142.22	63.3	43.3	86.3
Asparagine	3.82353	603.2	603.2	678.6	178	153	162
Aspartate	1.25792	165.62	130	139.62	114	113	119
Citrulline	3.8357	5.486	5.824	6.526	1.43	1.2	2.02
Glutamine	3.98945	1968.2	1827.8	2176.2	497	497	503
Glutamate	2.44378	4453.8	3595.8	4030	1597	1773	1573
Glycine	2.80376	611	624	553.8	230	195	213
Histidine	4.00982	64.74	73.32	66.04	16.8	14.9	19.2
Isoleucine	3.40554	165.62	189.8	161.2	55	45	51.7
Leucine	3.5343	184.6	208	191.62	61	49.3	55
Lysine	2.66783	34.84	48.62	39.26	17.2	10.6	18.2
Methionine	3.65774	40.56	53.04	45.76	13.9	10.9	13.3
Ornithine	9.14105	40.3	50.7	39.26	5.53	3.09	5.63
Phenylalanine	3.50153	63.7	61.36	57.72	19.6	14.3	18.3
Proline	3.73809	255.58	270.4	296.4	80	69.7	70.3
Serine	3.69057	335.4	338	309.4	97.7	78.3	90.3
Threonine	4.17024	186.42	164.58	178.62	41.3	40.7	45
Triptophan	3.62963	15.158	18.98	16.822	4.67	4.07	5.3
Thyrosine	3.73808	73.32	66.56	70.2	21.4	16.4	18.4
Valine	3.75467	78.78	78.78	87.62	24	18	23.3
alpha-AAA	4.34365	7.306	6.76	7.826	1.5	1.5	2.04
Spermidine	3.16373	10.062	10.062	11.102	3.29	3.18	3.4
sugars	2.17846	988	1661.4	1112.8	631	400	696
Carnosine	2.41555	0.4914	0.702	0.5772	0.261	0.174	0.298
Met-SO	2.98948	2.5298	2.912	2.002	0.943	0.67	0.877
Putrescine	5.92834	56.94	60.32	64.74	10.6	7.6	12.5
Spermine	3.04668	8.762	7.332	9.62	2.73	3.25	2.46
t4-OH-Pro	3.36721	169.78	179.4	205.4	63.7	50	51
Taurine	2.15377	408.2	416	405.6	177	199	195
PC aa C38:3	4.6613	1.0374	0.7176	0.9672	0.168	0.208	0.208
PC aa C40:2	3.70741	0.065	0.0676	0.0676	0.017	0.026	0.011
PC aa C42:4	3.705	0.0442	0.052	0.052	0.016	0.013	0.011
PC ae C40:2	2.83214	0.13	0.0962	0.091	0.038	0.038	0.036
PC ae C42:2	3.34	0.1534	0.1404	0.1404	0.037	0.048	0.045
lysoPC a C16:0	4.66207	2.3192	1.6848	1.1336	0.454	0.446	0.202
lysoPC a C16:1	4.13021	0.3198	0.2392	0.234	0.08	0.066	0.046
lysoPC a C17:0	3.82222	0.1768	0.1638	0.1066	0.043	0.052	0.022
lysoPC a C18:0	4.79833	1.9552	1.4248	1.2168	0.342	0.422	0.194
lysoPC a C18:1	5.36393	1.586	1.0738	0.9984	0.282	0.268	0.132
lysoPC a C20:4	4.43393	0.2158	0.1508	0.13	0.038	0.048	0.026
lysoPC a C26:1	2.20552	0.1118	0.0936	0.1144	0.048	0.076	0.021
lysoPC a C28:0	1.73119	0.2678	0.208	0.2236	0.173	0.194	0.037
lysoPC a C28:1	1.84615	0.2418	0.1612	0.221	0.124	0.161	0.053
PC aa C28:1	2.06157	0.6344	0.5226	0.7046	0.296	0.451	0.156
PC aa C30:0	3.10966	2.4596	1.5704	1.443	0.54	0.766	0.454
PC aa C30:2	3.50843	0.1352	0.0832	0.0728	0.026	0.034	0.023
PC aa C32:0	2.44566	4.03	3.016	3.666	1.43	1.61	1.34
PC aa C32:1	5.25732	30.16	18.694	17.914	3.37	5.22	4.11
PC aa C32:2	5.34762	3.952	2.626	2.652	0.455	0.678	0.593
PC aa C32:3	4.31489	0.4264	0.273	0.3146	0.081	0.082	0.072
PC aa C34:1	4.5774	60.06	35.36	40.3	8.25	12.1	9.3
PC aa C34:2	5.28889	21.944	13.182	14.378	2.62	3.53	3.21
PC aa C34:3	5.15301	2.1424	1.5756	1.4144	0.288	0.363	0.345
PC aa C34:4	4.26093	0.7124	0.5512	0.4706	0.125	0.144	0.138
PC aa C36:1	4.57649	4.862	3.744	5.096	0.844	1.06	1.09
PC aa C36:2	5.58921	23.504	13.832	17.55	2.69	3.98	3.15
PC aa C36:3	4.73745	7.514	4.186	4.81	0.975	1.35	1.16
PC aa C36:4	3.90823	5.59	3.224	3.536	0.85	1.21	1.1
PC aa C36:5	2.40178	2.652	1.469	1.5496	0.778	1.06	0.523
PC aa C36:6	3.82617	0.7306	0.3796	0.4394	0.121	0.161	0.123
PC aa C38:0	4.70737	0.351	0.2496	0.2938	0.051	0.079	0.06
PC aa C38:4	4.64756	3.224	1.9474	2.353	0.455	0.622	0.542
PC aa C38:5	2.54579	5.564	3.224	3.666	1.67	2.26	0.962
PC aa C38:6	3.94376	4.42	2.73	2.808	0.728	1.08	0.717
PC aa C40:3	3.72346	0.1144	0.0598	0.1274	0.035	0.03	0.016
PC aa C40:4	5.00597	0.2392	0.2028	0.2288	0.03	0.061	0.043
PC aa C40:5	3.8894	1.2116	0.663	0.988	0.243	0.3	0.193
PC aa C40:6	3.68897	2.2802	1.2818	1.6874	0.406	0.649	0.368
PC aa C42:1	2.97742	0.0676	0.0546	0.0624	0.024	0.021	0.017
PC aa C42:5	6.46667	0.2054	0.0754	0.2236	0.033	0.023	0.022
PC ae C30:0	2.35862	0.3978	0.2548	0.2366	0.127	0.166	0.084
PC ae C30:1	3.64954	0.1716	0.117	0.1092	0.036	0.052	0.021
PC ae C30:2	2.97143	0.0312	0.0338	0.039	0.013	0.015	0.007
PC ae C32:1	4.6829	3.25	1.9994	2.3088	0.417	0.669	0.528
PC ae C32:2	5.19358	0.8684	0.598	0.637	0.133	0.164	0.108
PC ae C34:0	2.54395	0.7306	0.6474	0.7462	0.281	0.294	0.26
PC ae C34:1	4.74044	8.476	5.278	5.824	1.12	1.66	1.35
PC ae C34:2	6.57981	2.782	1.6952	1.846	0.274	0.38	0.307
PC ae C34:3	4.09104	0.4264	0.3094	0.4056	0.086	0.108	0.085
PC ae C36:0	3.42757	0.5096	0.3718	0.4862	0.162	0.119	0.118
PC ae C36:1	4.35022	2.5792	1.5392	1.911	0.409	0.558	0.419
PC ae C36:2	5.44415	3.38	2.0384	2.3504	0.415	0.546	0.466
PC ae C36:3	4.64934	1.014	0.5044	0.611	0.123	0.169	0.166
PC ae C36:4	3.69778	1.2194	0.7254	0.7176	0.209	0.297	0.214
PC ae C36:5	3.40123	0.9698	0.5668	0.6708	0.178	0.24	0.231
PC ae C38:0	3.94761	0.5694	0.3718	0.4602	0.114	0.138	0.103
PC ae C38:1	3.67162	0.1404	0.156	0.247	0.037	0.068	0.043
PC ae C38:2	4.01304	0.4992	0.3692	0.4238	0.102	0.119	0.101
PC ae C38:3	4.48106	0.442	0.3562	0.3848	0.086	0.105	0.073
PC ae C38:4	3.37154	0.689	0.4342	0.5356	0.145	0.167	0.18
PC ae C38:5	2.86621	1.1778	0.6682	0.6734	0.257	0.379	0.243
PC ae C38:6	3.53098	0.8008	0.559	0.5434	0.145	0.207	0.187
PC ae C40:1	2.95056	0.2366	0.117	0.1716	0.056	0.074	0.048
PC ae C40:3	3.94286	0.1144	0.078	0.1664	0.028	0.037	0.026
PC ae C40:4	3.02199	0.2314	0.1638	0.182	0.069	0.063	0.059
PC ae C40:5	2.83763	0.4784	0.26	0.3172	0.118	0.159	0.095
PC ae C40:6	3.71571	0.3926	0.2574	0.3198	0.091	0.106	0.064
PC ae C42:3	1.9403	0.169	0.0988	0.1222	0.076	0.091	0.034
SM (OH) C14:1	2.5675	0.3874	0.234	0.2002	0.1	0.127	0.093
SM (OH) C16:1	3.62569	0.1872	0.1092	0.0988	0.036	0.041	0.032
SM C16:0	2.71594	5.018	2.808	2.4674	1.21	1.5	1.08
SM C16:1	3.10455	0.6682	0.5252	0.3744	0.135	0.199	0.171
SM C18:0	5.11395	1.0114	0.5668	0.585	0.115	0.172	0.136
SM C18:1	4.5	0.208	0.1456	0.1144	0.031	0.046	0.027
SM C24:0	3.49853	0.1508	0.1352	0.1898	0.044	0.041	0.051
SM C24:1	2.39859	0.1144	0.0832	0.143	0.045	0.04	0.057
C2	2.27099	0.858	0.9958	0.91	0.45	0.371	0.396
C4	1.31931	0.4992	0.5694	0.5304	0.418	0.389	0.405
C5	-1.56482	0.9984	0.9334	1.027	1.61	1.49	1.53

## Sheet: G12C BEZ235 vs G12C untargeted
Metabolite	Fold change	intensity						m/z	adduct
	G12C Bez235 vs G12C	G12C Bez235 R1 vs G12C R1	G12C Bez235 R2 vs G12C R2	G12C Bez235 R3 vs G12C R3	G12C R1	G12C R2	G12C R3
S-Nitrosoglutathione	only G12C Bez	273.528	2002.39	701.046				335.067	M-H
Oleic acid	only G12C				5515.87	31140.3	2162.71	281.249	M-H
3-O-Sulfogalactosylceramide (d18:1/26:1(17Z))	only G12C				342.39	920.385	223.175	916.66	M-H
Trihexosylceramide (d18:1/12:0)	only G12C				512.907	359.001	417.535	966.604	M-H
TG(20:0/22:2(13Z,16Z)/o-18:0)	only G12C Bez	265.176	757.422	1236.27				955.896	M-H
TG(18:1(11Z)/22:2(13Z,16Z)/18:1(11Z))	only G12C				575.848	370.527	572.797	937.821	M-H
PE(18:4(6Z,9Z,12Z,15Z)/P-16:0)	1.5558	4821.02	5766.01	5958.28	4148.46		2941.28	694.48	M-H
PC(22:6(4Z,7Z,10Z,13Z,16Z,19Z)/24:1(15Z))	only G12C Bez	1562.35	580.464	1696.5				914.666	M-H
Spermine	2.93055	64869.6	51668.6	38569.5	10811.7	7156.63	34959.5	203.223	M+H
Pyroglutamic acid	18.4507	34612.8	37277.9	45587	1337.24		2907.49	130.05	M+H
Proline	3.18346	1081.58	1128.56	1231.4	381.036		339.678	116.07	M+H
Pantothenic acid	7.59479	13684.6	6350.65	7730.47	759.925	947.505	1948.46	258.074	M+K
Ornithine	only G12C Bez	3526.28	8385.41	400.722				133.097	M+H
Nutriacholic acid	only G12C Bez	16015.5	48427.9	67231.7				429.24	M+K
N-Acetyl-L-aspartic acid	only G12C Bez	4080.47	970.05	663.288				214.011	M+K
Methionine	only G12C Bez	6362.14	2114.45	4416.99				188.014	M+K
Leucine	4.92493	3439.81	1224.44	1220.09		436.18	360.357	170.057	M+K
Histidine	7.5867	10442.1	16413.9	11027.9	1348.77	429.061	3215.64	156.076	M+H
Glutathione	19.3821	74207.2	27692.8	31091.7	1530.47	1626.18	3704.93	346.047	M+K
Glutamine	8.35039	172756	236932	220724	33447.2	4749.28	37298.4	169.058	M+Na
Glutamic acid	18.6624	132094	140487	221163	8397.82		9239.9	148.06	M+H
Dihydrothymine	6.14328	20177.2	10800.2	10065.9	1675.45	1630.82	3374.74	167.021	M+K
Creatinine	6.11483	5312.22	1370.95	2171.35		559.915	405.444	152.022	M+K
Creatine	13.354	55641.2	37644.2	43902.8	2036.26	1713.19	6523.72	132.076	M+H
Gamma-Butyrolactone	7.78536	23411	15551.9	13499.8	1062.09	2456.28	3220.27	125	M+K
Asparagine	8.14225	29473.7	48920.1	46486	5959.39	605.793	8772.08	155.042	M+Na
Arginine	only G12C				875.411	1880.55	2826.81	213.075	M+K
8-Hydroxyguanosine	27.1515	118990	113671	127745	7066.12	1081.52	5126.24	338.05	M+Na
5'-Methylthioadenosine	2.83793	8517.47	8419.86	7573.7	4898.21	255.493	3483.22	320.079	M+Na
4-Hydroxyproline	5.40601	6241.73	6907.63	14561.4	2623.18	281.822	2220.9	154.047	M+Na
TG(8:0/8:0/8:0)	only G12C Bez	5940.19	4065.86	1988.82				471.365	M+H
TG(20:0/20:0/16:0)	only G12C Bez	2223.2	1130.13	895.404				941.848	M+H
SM(d18:1/16:0)	only G12C Bez	598.56	899.928	1040.17				726.561	M+Na
SM(d18:0/16:1(9Z))	only G12C Bez	5208.69	2875.18	10237.8				725.556	M+Na
PE(15:0/16:0)	5.63739	7315.31	2260.09	10381	2022.81		337.192	678.505	M+H
PC(22:6(4Z,7Z,10Z,13Z,16Z,19Z)/16:0)	only G12C Bez	2198.32	551.232	979.968				844.529	M+K
PC(20:0/22:5(7Z,10Z,13Z,16Z,19Z))	only G12C Bez	1042.61	377.406	1922.53				864.651	M+H
MG(18:0/0:0/0:0)	only G12C Bez	1359.98	23863.4	4205.93				381.297	M+Na
MG(0:0/16:0/0:0)	only G12C Bez	9627.07	125537	39998.6				353.266	M+Na
MG(0:0/16:0/0:0)	only G12C Bez	12085.7	72299.4	54648.4				369.24	M+K
LysoPC(20:4(5Z,8Z,11Z,14Z))	only G12C Bez	94528.8	14094	29332.6				544.337	M+H
LysoPC(20:3(5Z,8Z,11Z))	only G12C Bez	24171	857.298	16137.8				546.352	M+H
LysoPC(18:4(6Z,9Z,12Z,15Z))	8.06693	38027.2	7900.99	16638.8		3787.19	1383.46	516.305	M+H
LysoPC(18:3(6Z,9Z,12Z))	20.3619	52668.2	8768.21	27583.9		1944.39	970.218	518.321	M+H
Glycerophosphocholine	21.8036	2.24645e+06	2.16088e+06	2.33148e+06	152755	24992.5	131321	280.092	M+Na

## Sheet: G12C BEZ235 vs G12C targeted
Metabolite	Fold change	microM
	G12C Bez235 vs G12C	G12C BEZ235 R1 vs G12C R1	G12C BEZ235 R1 vs G12C R2	G12C BEZ235 R1vs G12C R3	G12C R1	G12C R2	G12C R3
Asparagine	1.17863	210.54	222.72	214.02	179.67	176.28	193.23
Glycine	1.52398	294.06	287.1	255.78	196.62	169.5	183.06
Histidine	1.22018	23.664	24.36	21.054	19.436	18.419	18.758
Leucine	1.26011	70.122	93.96	71.862	63.619	62.941	60.681
Methionine	1.37651	17.4	22.794	21.402	16.611	13.334	14.803
Ornithine	4.28712	19.836	36.192	19.836	8.136	4.5539	5.0059
Phenylalanine	1.2498	23.316	25.926	23.49	21.696	17.854	18.645
Serine	1.32101	125.802	146.16	123.018	104.299	114.13	80.569
Triptophan	1.33847	5.742	6.96	7.308	5.424	4.4409	5.085
Tyrosine	1.27288	24.36	29.232	25.23	23.278	19.549	19.097
Valine	1.36704	28.014	35.844	29.754	26.894	21.47	20.114
t4-OH-Pro	1.20276	77.778	101.442	84.042	74.919	71.981	71.981
alpha-AAA	1.83504	2.9406	3.828	2.7492	1.8419	1.6611	1.6837
Putrescine	3.07965	32.538	42.63	32.016	14.577	8.136	12.091
Taurine	1.25178	292.32	262.74	254.04	235.04	200.01	211.31
PC aa C32:0	4.2191	7.2036	7.743	7.2036	1.9549	2.7685	0.52658
PC aa C34:2	3.97374	18.444	18.444	11.832	4.5652	6.215	1.4803
PC aa C38:1	2.91756	0.1827	0.14442	0.11136	0.0678	0.0678	0.01469
PC ae C36:1	3.83636	2.175	2.175	1.71912	0.62602	0.7797	0.17628
SM (OH) C14:1	2.35981	0.24186	0.24186	0.17226	0.12317	0.13108	0.02373
lysoPC a C16:1	2.98227	0.2697	0.33756	0.24534	0.13673	0.08927	0.05989
lysoPC a C18:1	3.11077	1.14318	1.27716	0.88392	0.55257	0.43957	0.07006
lysoPC a C20:4	3.94681	0.3045	0.3915	0.15138	0.13673	0.06667	0.0113
PC aa C30:0	3.70104	2.0532	2.262	1.58166	0.68591	0.75145	0.15594
PC aa C30:2	2.64487	0.10266	0.09048	0.0609	0.04859	0.0339	0.01356
PC aa C32:1	4.45533	21.576	22.794	15.138	5.1302	6.7913	1.4351
PC aa C32:2	4.20165	3.5322	3.6018	2.2098	0.85202	1.05429	0.31753
PC aa C32:3	2.7866	0.36018	0.34104	0.2088	0.14803	0.12769	0.05085
PC aa C34:1	4.16469	46.806	46.458	37.236	11.526	16.611	3.1979
PC aa C34:3	3.75578	2.1054	2.1402	1.22496	0.53223	0.73902	0.18532
PC aa C34:4	3.93598	0.58986	0.69078	0.46284	0.17063	0.20566	0.06667
PC aa C36:1	4.27366	4.6458	4.263	4.7676	1.2204	1.6724	0.30736
PC aa C36:2	3.86351	18.096	18.27	14.2332	4.8703	6.8817	1.3447
PC aa C36:3	3.68288	7.0644	6.5598	4.5414	1.7854	2.6329	0.51415
PC aa C36:4	3.96915	5.6202	5.3418	3.6192	1.3786	1.8193	0.47573
PC aa C36:5	2.72288	2.4534	2.4012	1.57296	0.93903	1.1526	0.26894
PC aa C36:6	2.83484	0.52722	0.54984	0.3132	0.20001	0.23956	0.05085
PC aa C38:0	3.84325	0.3567	0.36888	0.33408	0.11413	0.12882	0.03277
PC aa C38:3	3.87235	1.2354	1.131	1.03356	0.33561	0.46556	0.07684
PC aa C38:4	4.20018	3.6888	3.567	2.7492	0.88027	1.243	0.25877
PC aa C38:5	2.72573	5.4636	4.9938	3.828	2.1696	2.6103	0.46104
PC aa C38:6	3.09582	3.5322	3.4452	2.349	1.243	1.469	0.30058
PC aa C40:2	2.91966	0.08178	0.07656	0.0957	0.03277	0.04633	0.00791
PC aa C40:3	2.38376	0.09396	0.1044	0.08178	0.04633	0.05424	0.01695
PC aa C40:4	4.04306	0.28188	0.3045	0.26796	0.08927	0.09944	0.0226
PC aa C40:5	4.17335	1.08054	1.05444	0.89262	0.27911	0.37968	0.06667
PC aa C40:6	2.56418	1.72086	1.72608	1.305	0.71755	0.95033	0.18532
PC aa C42:1	2.32158	0.06264	0.04176	0.06612	0.02938	0.0339	0.01017
PC aa C42:4	2.35331	0.06264	0.04176	0.03654	0.01921	0.03164	0.00904
PC aa C42:5	4.82354	0.14442	0.16182	0.14616	0.03164	0.04746	0.01469
PC ae C30:0	3.18062	0.39672	0.39498	0.3045	0.15255	0.15368	0.03842
PC ae C30:1	3.69832	0.1566	0.1827	0.12876	0.05537	0.05876	0.01243
PC ae C30:2	2.3464	0.05394	0.0348	0.02262	0.02147	0.02034	0.00565
PC ae C32:1	6.05433	4.1412	4.0716	3.0276	0.72772	0.91643	0.21244
PC ae C32:2	5.04635	0.79518	0.8613	0.64728	0.18193	0.20566	0.06893
PC ae C34:0	2.81416	1.01964	1.0092	1.10664	0.43731	0.5537	0.12317
PC ae C34:1	5.02633	9.048	9.5526	7.1514	1.8871	2.7346	0.50172
PC ae C34:2	5.70677	2.784	2.958	2.1576	0.49381	0.70286	0.18758
PC ae C34:3	4.41974	0.45066	0.48024	0.26274	0.09831	0.1356	0.03616
PC ae C36:0	2.77781	0.4611	0.3828	0.261	0.15029	0.18984	0.05763
PC ae C36:2	3.98185	2.9232	2.8188	2.2446	0.74467	1.02717	0.23391
PC ae C36:3	5.03234	0.87348	0.9918	0.7221	0.21018	0.24521	0.05876
PC ae C36:4	5.46765	1.9662	1.827	1.43376	0.34352	0.46782	0.14464
PC ae C36:5	5.43438	1.37982	1.479	1.02834	0.28137	0.35708	0.07684
PC ae C38:0	2.70601	0.45066	0.52026	0.27666	0.18419	0.2034	0.07345
PC ae C38:1	2.89592	0.21924	0.18444	0.17226	0.09718	0.08136	0.02034
PC ae C38:2	3.7976	0.50634	0.48198	0.41064	0.13899	0.1921	0.03729
PC ae C38:3	3.39667	0.45588	0.38802	0.3306	0.13221	0.17515	0.03842
PC ae C38:4	4.33326	0.90654	0.9396	0.78822	0.2147	0.30962	0.08362
PC ae C38:5	4.04112	1.74	1.71738	1.33284	0.44635	0.60003	0.13899
PC ae C38:6	4.63498	1.24584	1.392	1.00224	0.27911	0.40341	0.10283
PC ae C40:1	2.95133	0.2436	0.2175	0.1392	0.08475	0.10057	0.01808
PC ae C40:2	2.14046	0.10788	0.12354	0.10962	0.07119	0.07232	0.01582
PC ae C40:3	2.97186	0.13398	0.10788	0.09396	0.05198	0.0452	0.01582
PC ae C40:4	3.0195	0.29232	0.29406	0.2871	0.10961	0.12543	0.05424
PC ae C40:5	3.14081	0.5307	0.5394	0.44892	0.20114	0.23052	0.05198
PC ae C40:6	3.15127	0.52548	0.45414	0.39846	0.15594	0.21244	0.06893
SM (OH) C16:1	4.78156	0.17052	0.22272	0.12006	0.05311	0.04407	0.01017
SM (OH) C22:2	5.27093	0.04176	0.06264	0.05046	0.01243	0.01469	0.00226
SM C16:0	2.90377	2.8014	3.393	2.3664	1.3334	1.356	0.25877
SM C16:1	3.02855	0.5829	0.61248	0.35148	0.21809	0.23165	0.06102
SM C18:0	3.83657	0.609	0.72558	0.46458	0.2034	0.21244	0.05311
SM C18:1	4.23451	0.14616	0.1827	0.11136	0.04181	0.05424	0.00791
SM C24:0	3.24638	0.15312	0.21924	0.20358	0.08588	0.07345	0.01808
SM C24:1	3.18822	0.14616	0.19488	0.22098	0.0791	0.07232	0.02486
C2	2.02914	1.05618	1.04052	0.99876	0.56048	0.47799	0.48703
C4	1.18291	0.8961	0.85782	0.87	0.78987	0.71303	0.71529
C5	-3.18142	0.74994	0.6786	0.6351	2.2487	2.2939	2.0227
