# Supplementary material for: NSCLC Cells Resistance to PI3K/mTOR Inhibitors Is Mediated by Delta-6 Fatty Acid Desaturase (FADS2)
Source: Cells. 2022 Nov 22;11(23):3719. doi: 10.3390/cells11233719 (PMC9736998; doi:10.3390/cells11233719)
Supplement: Supplementary file 1 [file cells-11-03719-s001.zip › Supplemental table S2.xlsx]

## Sheet: wt BEZ235 vs wt
	total	expected	hits	Raw p	Holm p	FDR
Glycine and Serine Metabolism	59	2.65	10	0.00015	0.0147	0.00823
Urea Cycle	29	1.3	7	0.000171	0.0166	0.00823
Ammonia Recycling	32	1.44	7	0.000333	0.032	0.00823
Arginine and Proline Metabolism	53	2.38	9	0.000336	0.032	0.00823
Aspartate Metabolism	35	1.57	7	0.000601	0.0565	0.0118
Glutathione Metabolism	21	0.943	5	0.00174	0.162	0.0284
Spermidine and Spermine Biosynthesis	18	0.809	4	0.00687	0.632	0.0962
Malate-Aspartate Shuttle	10	0.449	3	0.00816	0.743	0.1
Glucose-Alanine Cycle	13	0.584	3	0.0177	1	0.186
Glutamate Metabolism	49	2.2	6	0.019	1	0.186
Alanine Metabolism	17	0.764	3	0.0371	1	0.32
Methionine Metabolism	43	1.93	5	0.0391	1	0.32
Beta-Alanine Metabolism	34	1.53	4	0.0615	1	0.464
Phenylalanine and Tyrosine Metabolism	28	1.26	3	0.127	1	0.888
Lysine Degradation	30	1.35	3	0.148	1	0.966
Methylhistidine Metabolism	4	0.18	1	0.168	1	1
Amino Sugar Metabolism	33	1.48	3	0.181	1	1
Gluconeogenesis	35	1.57	3	0.205	1	1
Lactose Synthesis	20	0.898	2	0.225	1	1
Carnitine Synthesis	22	0.988	2	0.26	1	1
Warburg Effect	58	2.61	4	0.26	1	1
Sphingolipid Metabolism	40	1.8	3	0.266	1	1
Valine, Leucine and Isoleucine Degradation	60	2.7	4	0.281	1	1
Histidine Metabolism	43	1.93	3	0.304	1	1
Biotin Metabolism	8	0.359	1	0.309	1	1
Phenylacetate Metabolism	9	0.404	1	0.34	1	1
Homocysteine Degradation	9	0.404	1	0.34	1	1
Lactose Degradation	9	0.404	1	0.34	1	1
Selenoamino Acid Metabolism	28	1.26	2	0.361	1	1
D-Arginine and D-Ornithine Metabolism	11	0.494	1	0.398	1	1
Taurine and Hypotaurine Metabolism	12	0.539	1	0.426	1	1
Phosphatidylethanolamine Biosynthesis	12	0.539	1	0.426	1	1
Purine Metabolism	74	3.32	4	0.429	1	1
Thyroid hormone synthesis	13	0.584	1	0.452	1	1
Pyrimidine Metabolism	59	2.65	3	0.502	1	1
Nicotinate and Nicotinamide Metabolism	37	1.66	2	0.503	1	1
Tryptophan Metabolism	60	2.7	3	0.514	1	1
Galactose Metabolism	38	1.71	2	0.518	1	1
Beta Oxidation of Very Long Chain Fatty Acids	17	0.764	1	0.545	1	1
Porphyrin Metabolism	40	1.8	2	0.546	1	1
Propanoate Metabolism	42	1.89	2	0.573	1	1
Catecholamine Biosynthesis	20	0.898	1	0.605	1	1
Threonine and 2-Oxobutanoate Degradation	20	0.898	1	0.605	1	1
Betaine Metabolism	21	0.943	1	0.623	1	1
Transfer of Acetyl Groups into Mitochondria	22	0.988	1	0.64	1	1
Tyrosine Metabolism	72	3.23	3	0.642	1	1
Androstenedione Metabolism	24	1.08	1	0.672	1	1
Estrone Metabolism	24	1.08	1	0.672	1	1
Glycolysis	25	1.12	1	0.687	1	1
Cysteine Metabolism	26	1.17	1	0.702	1	1
Oxidation of Branched Chain Fatty Acids	26	1.17	1	0.702	1	1
Folate Metabolism	29	1.3	1	0.741	1	1
Starch and Sucrose Metabolism	31	1.39	1	0.765	1	1
Androgen and Estrogen Metabolism	33	1.48	1	0.786	1	1
Bile Acid Biosynthesis	65	2.92	2	0.805	1	1
Retinol Metabolism	37	1.66	1	0.823	1	1
Arachidonic Acid Metabolism	69	3.1	2	0.832	1	1
Pyruvate Metabolism	48	2.16	1	0.896	1	1

## Sheet: G12C BEZ235 vs G12C
	total	expected	hits	Raw p	Holm p	FDR
Spermidine and Spermine Biosynthesis	18	0.633	5	0.000249	0.0244	0.0244
Ammonia Recycling	32	1.12	6	0.000574	0.0557	0.0281
Glycine and Serine Metabolism	59	2.07	7	0.00329	0.316	0.107
Aspartate Metabolism	35	1.23	5	0.00609	0.579	0.149
Arginine and Proline Metabolism	53	1.86	6	0.00845	0.795	0.166
Methionine Metabolism	43	1.51	5	0.0147	1	0.228
Urea Cycle	29	1.02	4	0.0163	1	0.228
Glutathione Metabolism	21	0.738	3	0.0343	1	0.421
Phenylalanine and Tyrosine Metabolism	28	0.984	3	0.0715	1	0.779
Beta-Alanine Metabolism	34	1.2	3	0.113	1	1
Alanine Metabolism	17	0.598	2	0.117	1	1
Methylhistidine Metabolism	4	0.141	1	0.134	1	1
Glutamate Metabolism	49	1.72	3	0.245	1	1
Phenylacetate Metabolism	9	0.316	1	0.276	1	1
Homocysteine Degradation	9	0.316	1	0.276	1	1
Lysine Degradation	30	1.05	2	0.285	1	1
Malate-Aspartate Shuttle	10	0.352	1	0.302	1	1
Amino Sugar Metabolism	33	1.16	2	0.325	1	1
Taurine and Hypotaurine Metabolism	12	0.422	1	0.351	1	1
Phosphatidylethanolamine Biosynthesis	12	0.422	1	0.351	1	1
Valine, Leucine and Isoleucine Degradation	60	2.11	3	0.354	1	1
Glucose-Alanine Cycle	13	0.457	1	0.374	1	1
Thyroid hormone synthesis	13	0.457	1	0.374	1	1
Nicotinate and Nicotinamide Metabolism	37	1.3	2	0.377	1	1
Propanoate Metabolism	42	1.48	2	0.44	1	1
Histidine Metabolism	43	1.51	2	0.453	1	1
Beta Oxidation of Very Long Chain Fatty Acids	17	0.598	1	0.458	1	1
Purine Metabolism	74	2.6	3	0.49	1	1
Catecholamine Biosynthesis	20	0.703	1	0.515	1	1
Pantothenate and CoA Biosynthesis	21	0.738	1	0.532	1	1
Betaine Metabolism	21	0.738	1	0.532	1	1
Carnitine Synthesis	22	0.773	1	0.549	1	1
Cysteine Metabolism	26	0.914	1	0.61	1	1
Oxidation of Branched Chain Fatty Acids	26	0.914	1	0.61	1	1
Warburg Effect	58	2.04	2	0.617	1	1
Pyrimidine Metabolism	59	2.07	2	0.627	1	1
Tryptophan Metabolism	60	2.11	2	0.636	1	1
Selenoamino Acid Metabolism	28	0.984	1	0.638	1	1
Folate Metabolism	29	1.02	1	0.651	1	1
Bile Acid Biosynthesis	65	2.29	2	0.681	1	1
Tyrosine Metabolism	72	2.53	2	0.736	1	1
Retinol Metabolism	37	1.3	1	0.74	1	1
Porphyrin Metabolism	40	1.41	1	0.768	1	1
Sphingolipid Metabolism	40	1.41	1	0.768	1	1
Arachidonic Acid Metabolism	69	2.43	1	0.922	1	1
